# Supplementary material
Source: PubMed Central journal article supplement (PMC7863481)

# Supplementary figure 3

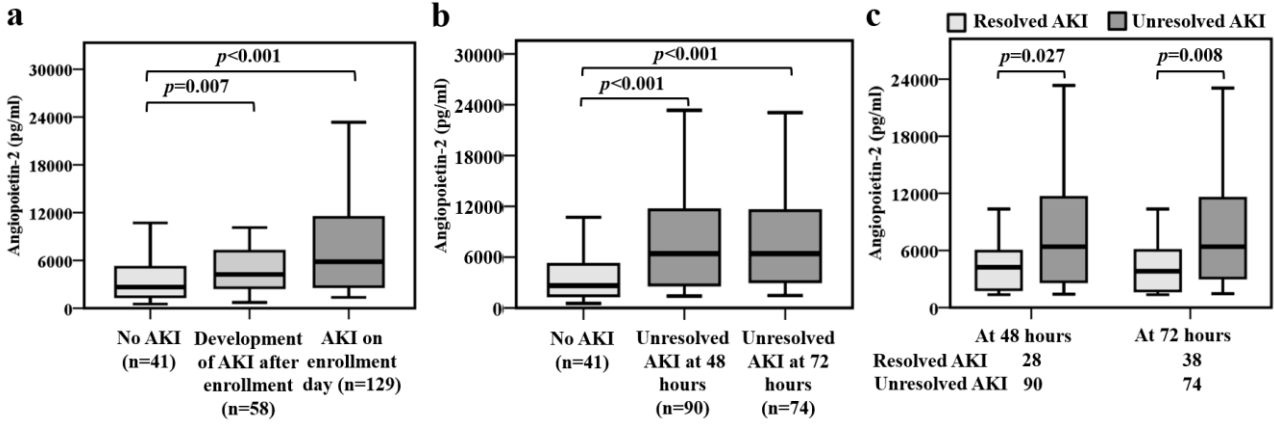

Supplement: 13054_2021_3474_MOESM3_ESM.pdf [file 13054_2021_3474_MOESM3_ESM.pdf]
